# Supplementary material
Source: PubMed Central journal article supplement (PMC4001373)
Supplement: supp_tpc.113.121731_tpc121731Supplemental.pdf [file supp_tpc.113.121731_tpc121731Supplemental.pdf]

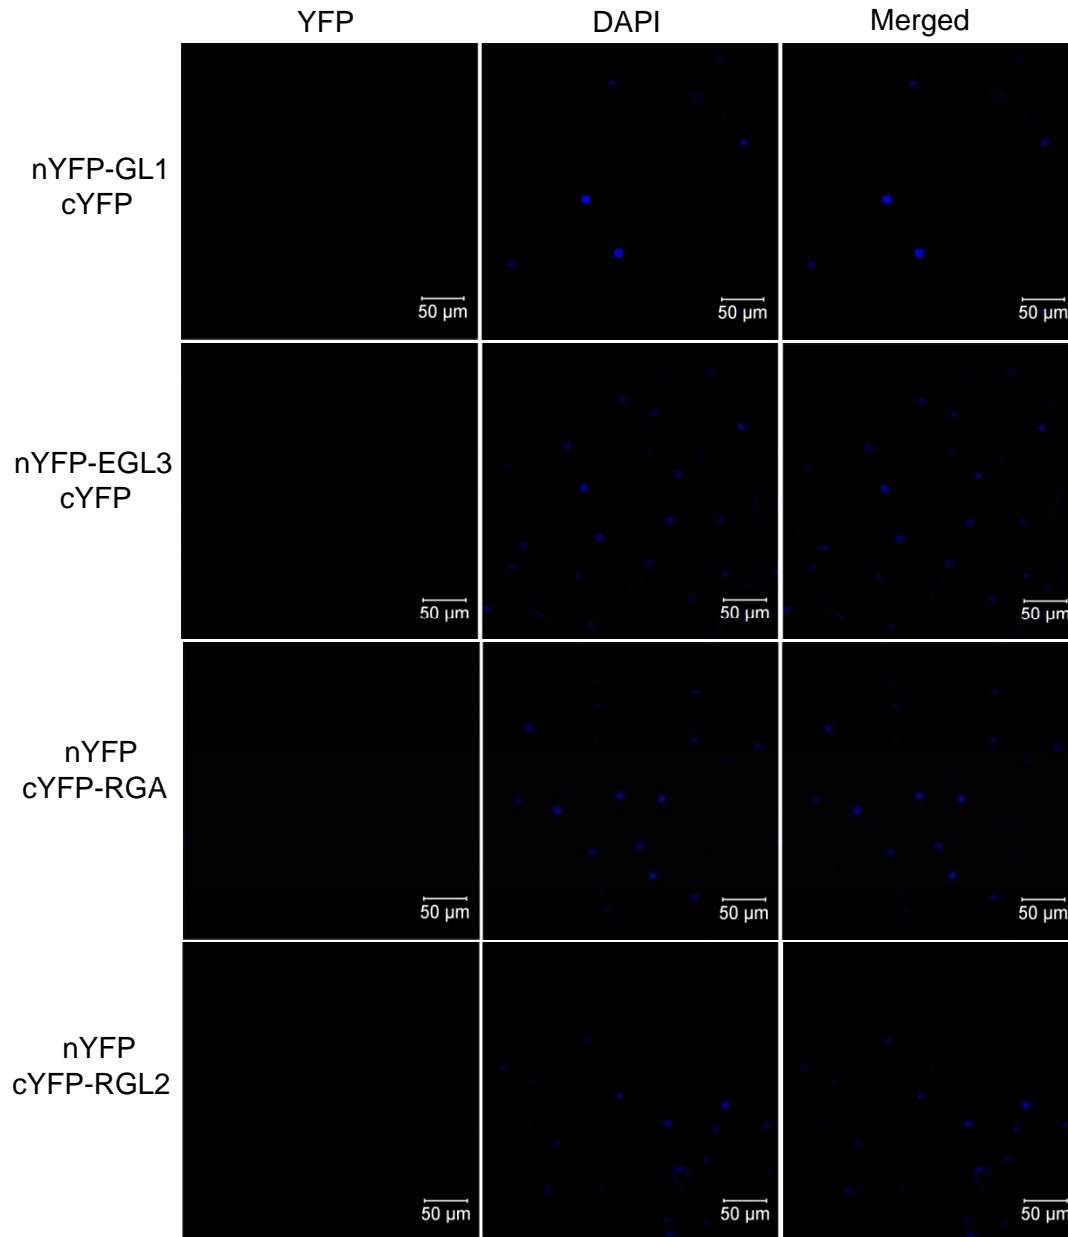

**Supplemental Figure 1. Negative Controls of BiFC Assay in *N. Benthamiana* Leaves.**

BiFC assay to detect the interactions of GL1 and EGL3 (fused with N-terminal fragment of YFP) with cYFP, and the interactions of RGA and RGL2 (fused with C-terminal fragment of YFP) with nYFP. YFP fluorescence was detected 50 h after infiltration. The nuclei are indicated by DAPI staining.

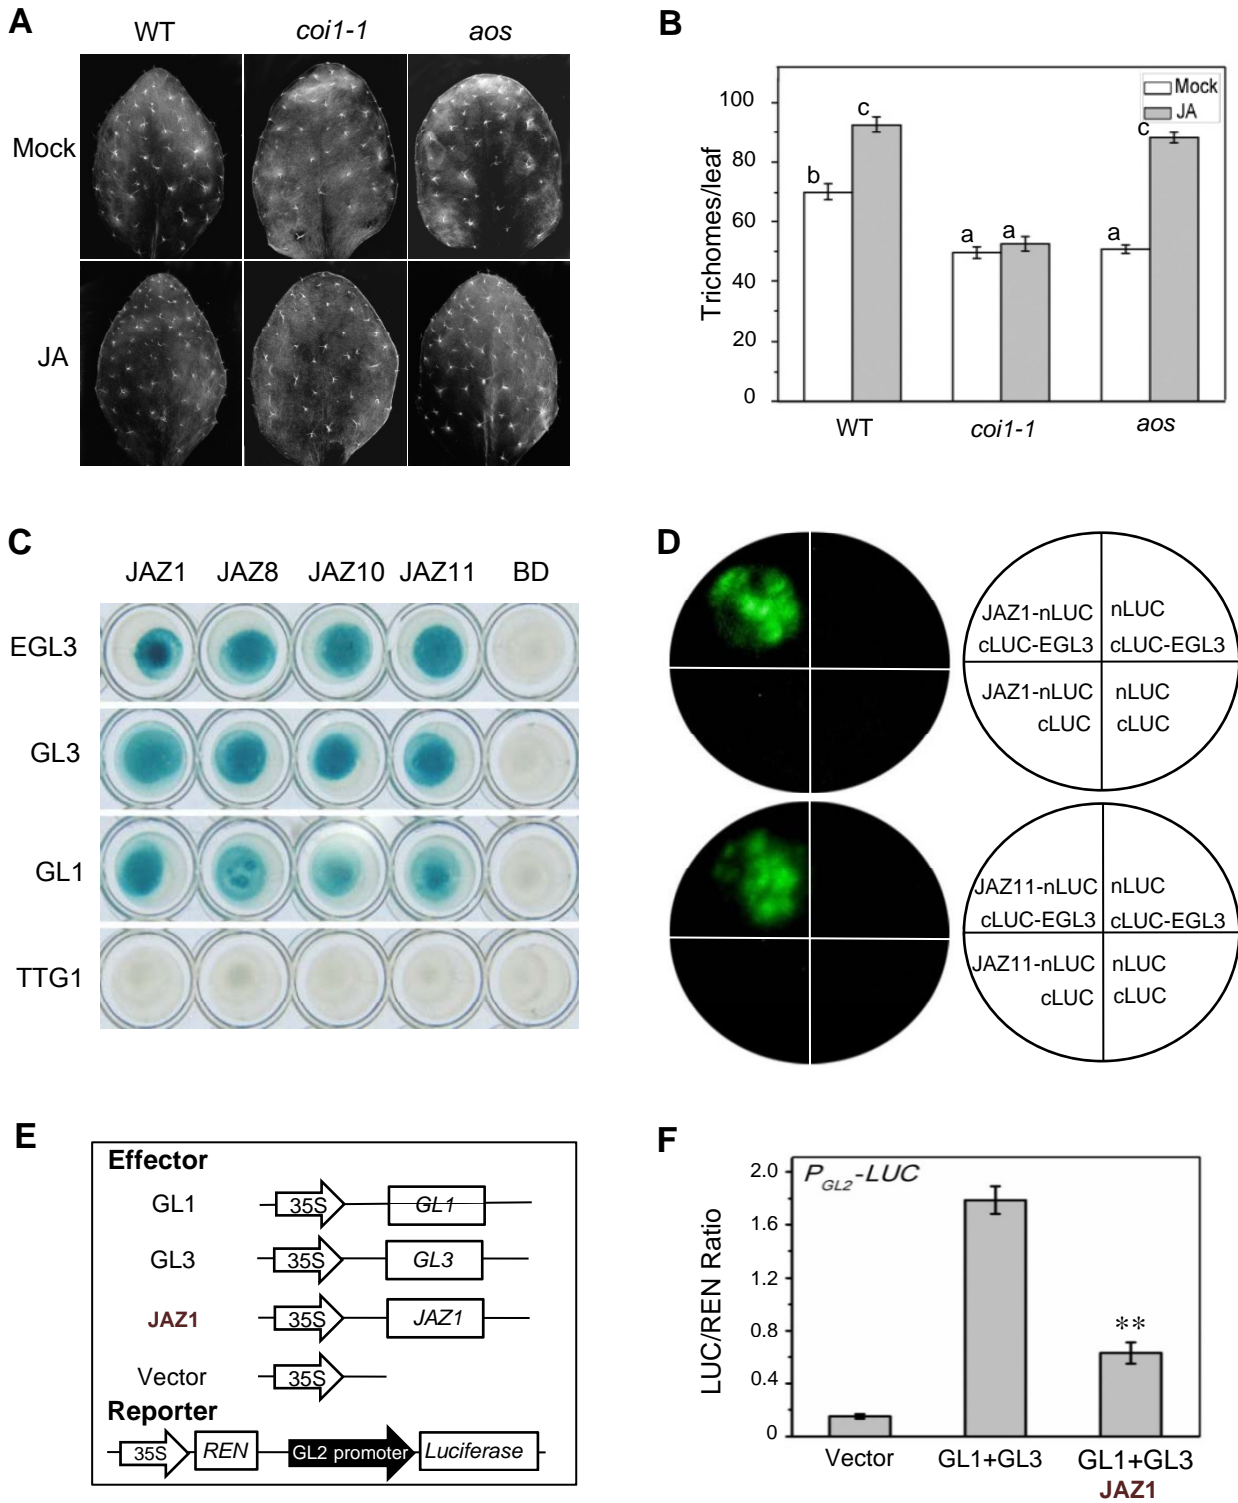

Supplemental Figure 2.

**Supplemental Figure 2. JAZs Interact with the WD-repeat/bHLH/MYB Complex to Modulate Jasmonate-regulated Trichome Development.**

(A) Trichome images of wild-type Col-0 (WT), *coil-1* and *aos* plants treated without (Mock) or with MeJA (JA). The fifth true leaves were selected to count trichome numbers.

(B) Statistical analysis of total trichome numbers in the fifth true leaves of Col-0 (WT), *coil-1* and *aos* plants indicated in (A). Eight leaves for each genotype were used for trichome number measurement in each biological experiment. Data are means ( $\pm$ SE) of three biological replicates. Lowercase letters indicate significant differences by one-way ANOVA analysis with SAS software ( $P < 0.05$ ).

(C) Y2H assay to detect the interactions of JAZs proteins with GL1, EGL3, GL3 and TTG1. The JAZ1, JAZ8, JAZ10 and JAZ11 were fused with the LexA BD, and GL1, EGL3, GL3 and TTG1 were fused with AD respectively.

(D) LCI assay shows that EGL3 interacts with JAZ1 and JAZ11 respectively in *N. benthamiana*. EGL3 was fused with C-terminal fragment of LUC (cLUC) to form cLUC-EGL3. JAZ1 and JAZ11 were fused with N-terminal fragment of LUC (nLUC) respectively to generate JAZ1-nLUC and JAZ11-nLUC. *Agrobacterium* strains containing indicated construct pairs were co-infiltrated into *N. benthamiana* leaves. Images were taken 50 h after infiltration.

(E) Schematic diagram shows the constructs used in the transient expression assays of (F).

(F) Transient expression assay shows that activation of *GL2* promoter by GL3/GL1 is repressed by JAZ1. The  $P_{GL2}$ -LUC reporter was cotransformed with the indicated constructs. Data are means ( $\pm$ SE) of three biological replicates. Asterisks represent Student's t-test significance compared with the GL1+GL3 sample (\*\*,  $P < 0.01$ ).

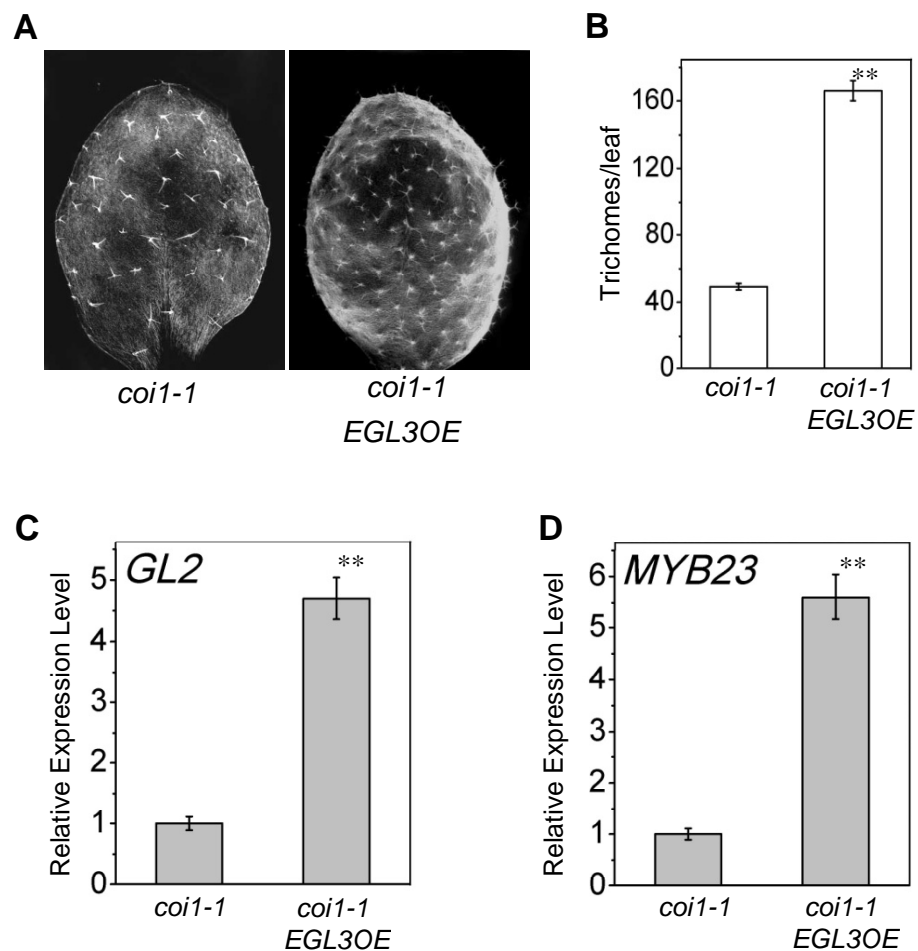

**Supplemental Figure 3. *EGL3* Overexpression Restores Trichome Formation in *coi1-1*.**

(A) Trichome images of *coi1-1* and *EGL3* overexpression transgenic plant in *coi1-1* background (*coi1-1* *EGL3OE*).

(B) Statistical analysis of total trichome numbers in the fifth true leaves of *coi1-1* and *coi1-1* *EGL3OE* indicated in (A). Eight leaves for each genotype were used for trichome number measurement in each biological experiment. Data are means ( $\pm$ SE) of three biological replicates. Asterisks represent Student's t-test significance compared with *coi1-1* (\*\*,  $P < 0.01$ ).

(C) and (D) Real-time PCR analysis for *GL2* (C) and *MYB23* (D) in *coi1-1* and *coi1-1* *EGL3OE* grown on MS medium. *ACTIN8* was used as the internal control. Data are means ( $\pm$ SE) of three biological replicates. Asterisks represent Student's t-test significance compared with *coi1-1* (\*\*,  $P < 0.01$ ).

Supplemental Table 1. Primers Used for Vector Construction.

|                   |                                                      |
|-------------------|------------------------------------------------------|
| GL1-AD-Forward    | ggggaattcatgagaataaggagaagagatg                      |
| GL1-AD-Reverse    | cccgctcgagctaaaggcagtactcaacatc                      |
| GL1-NT-AD-Forward | ggggaattcatgagaataaggagaagagatg                      |
| GL1-NT-AD-Reverse | cccgctcgagctaggcggaggagtaatctccgac                   |
| GL1-CT-AD-Forward | ggggaattcctcgtcggagattactcctc                        |
| GL1-CT-AD-Reverse | cccgctcgagctaaaggcagtactcaacatc                      |
| EGL3-AD-Forward   | ggggaattcatggcaaccggagaaaacagaac                     |
| EGL3-AD-Reverse   | cccgctcgagttaacatatccatgcaaccc                       |
| GL3-AD-Forward    | ggggaattcatggctaccggacaaaacagaacaactg                |
| GL3-AD-Reverse    | acgcgtcgactcaacagatccatgcaacccttgaagtgt              |
| GL3-NT-AD-Forward | ggggaattcatggctaccggacaaaacagaacaactg                |
| GL3-NT-AD-Reverse | cccgctcgagagtagttcatctctggcttctg                     |
| GL3-CT-AD-Forward | ggggaattcgttccgcgagtcaccagaaag                       |
| GL3-CT-AD-Reverse | acgcgtcgactcaacagatccatgcaacccttgaagtgt              |
| TTG1-AD-Forward   | ggggaattcatggataattcagctccagattc                     |
| TTG1-AD-Reverse   | cccgctcgagtcaactctaaggagctgcat                       |
| RGA-R-BD-Forward  | ccccaattggcgggtgagtcactcgttctg                       |
| RGA-R-BD-Reverse  | ccgctcgagtcagtagccgccgctcgagagttt                    |
| RGL2-R-BD-Forward | ccccaattgtcggacgagtcactcgttccgtgg                    |
| RGL2-R-BD-Reverse | ccccaattggagtcactcgttccgtggtgctt                     |
| MBP-GL1-Forward   | ccggaattcatgagaataaggagaagagatgaaaaag                |
| MBP-GL1-Reverse   | acgcgtcgacttagtgatgatgatgatgaaggcagtactcaacatc       |
| MBP-EGL3-Forward  | ccggaattcatggcaaccggagaaaacagaacggtg                 |
| MBP-EGL3-Reverse  | acgcgtcgacttagtgatgatgatgatg acatatccatgcaaccct      |
| MBP-GL3-Forward   | ccggaattcatggctaccggacaaaacagaacaactg                |
| MBP-GL3-Reverse   | acgcgtcgacttagtgatgatgatgatgacagatccatgcaaccct       |
| GL1-nYFP-Forward  | cggacaagtttgtacaaaaagcaggctccatgagaataaggagaagagatg  |
| GL1-nYFP-Reverse  | cggaccactttgtacaagaaagctgggtcgtgatgttgagtactgccttcag |

|                           |                                                      |
|---------------------------|------------------------------------------------------|
| EGL3-nYFP-Forward         | cggacaagtttgtaaaaaagcaggctccatggcaaccggagaaaacagaac  |
| EGL3-nYFP-Reverse         | cggaccactttgtacaagaagctgggtcacatatccatgcaacccttg     |
| cYFP-RGA-Forward          | cggacaagtttgtaaaaaagcaggctccatgaagagagatcatcaccaattc |
| cYFP-RGA-Reverse          | cggaccactttgtacaagaagctgggtctcagtagccgccgtcgagag     |
| cYFP-RGL2-Forward         | cggacaagtttgtaaaaaagcaggctccatgaagagaggatacggagaaac  |
| cYFP-RGL2-Reverse         | cggaccactttgtacaagaagctgggtctcaggcgagtttcacgccgag    |
| GL1-GAL4DB-Forward        | agacccgggatgagaataaggagaagagatgaa                    |
| GL1-GAL4DB- Reverse       | acgcgtcgacctaaaggcagtactcaacatcacc                   |
| GL3-GAL4DB-Forward        | agacccgggatggctaccggacaaaacagaacaac                  |
| GL3-GAL4DB- Reverse       | acgcgtcgactcaacagatccatgcaacccttgaag                 |
| EGL3-GAL4DB-Forward       | agacccgggatggcaaccggagaaaacagaac                     |
| EGL3-GAL4DB- Reverse      | acgcgtcgacttaacatatccatgcaacccttg                    |
| GL1-pGreen62-Forward      | atcgagctcatgagaataaggagaagag                         |
| GL1-pGreen62-Reverse      | agagtcgacctaaaggcagtactcaacatc                       |
| GL3-pGreen62-Forward      | atcgagctcatggctaccggacaaaacag                        |
| GL3-pGreen62-Reverse      | agagtcgactcaacagatccatgcaaccct                       |
| RGA-pGreen62-Forward      | atcgagctcatgaagagagatcatcacca                        |
| RGA-pGreen62-Reverse      | agagtcgactcagtagccgccgtcgagag                        |
| RGL2-pGreen62-Forward     | agacccgggatgaagagaggatacggag                         |
| RGL2-pGreen62-Reverse     | agagtcgactcaggcgagtttcacgccgag                       |
| GL2pro-pGreen0800-Forward | cggggtaccacgtctctgctcattacgtac                       |
| GL2pro-pGreen0800-Reverse | catgccatggacaaatcctgtccctagctag                      |
| JAZ1-BD-Forward           | cccgaattcatgtcgagttctatggaatg                        |
| JAZ1-BD-Reverse           | aaaagtcgactcatatttcagctgctaaacc                      |
| JAZ8-BD-Forward           | cccccatggatgaagctacagcaaaattgtg                      |
| JAZ8-BD-Reverse           | gggctcgagttatcgtctggaatggtacggtg                     |
| JAZ10-BD-Forward          | ggggaattcatgtcgaaagctaccatagaactcg                   |
| JAZ10-BD-Reverse          | acgcgtcgacttaggccgatgtcgatagtaag                     |
| JAZ11-BD-Forward          | ggggaattcatggctgaggtaaacggagatttc                    |

|                            |                                  |
|----------------------------|----------------------------------|
| JAZ11-BD-Reverse           | aaaagtcgactcatgtcacaatggggctgg   |
| JAZ1-pGreen62-Forward      | atcgagctcatgtcgagttctatggaatg    |
| JAZ1-pGreen62-Reverse      | agagtcgactcatatctcagctgctaaac    |
| JAZ1-nLUC-Forward          | cccgagctcatgtcgagttctatggaatg    |
| JAZ1-nLUC-Reverse          | agagtcgactatctcagctgctaaaccgag   |
| JAZ11-nLUC-Forward         | cggggtaccatggctgaggtaaacggaga    |
| JAZ11-nLUC-Reverse         | acgcgtcgac tgtcacaatggggctggttc  |
| cLUC-EGL3-Forward          | cggggtaccatggcaaccggagaaaacagaac |
| cLUC-EGL3-Reverse          | aaactgcagttaacatatccatgcaacc     |
| GL1overexpression-Forward  | agagtcgacatgagaataaggagaagagatg  |
| GL1overexpression-Reverse  | atcactagtaaggcagtaactcaacatcac   |
| EGL3overexpression-Forward | agagtcgacatggcaaccggagaaaacagaac |
| EGL3overexpression-Reverse | atcactagttaacatatccatgcaacc      |

Supplemental Table 2. Primers Used for Quantitative Real-time PCR Analysis.

|                         |                            |
|-------------------------|----------------------------|
| GL2-realtime-Forward    | aagctcgtcgcatgagt          |
| GL2-realtime-Reverse    | ttctctcgatttcactgtctgg     |
| MYB23-realtime-Forward  | aatgttaacagaggcaattttactga |
| MYB23-realtime-Reverse  | tcttttcgctatcaacgacca      |
| Actin8-realtime-Forward | tcagcactttccagcagatg       |
| Actin8-realtime-Reverse | ctgtggacaatgcctggac        |
